# Supplementary material for: A ring trial to harmonize Toxoplasma gondii microsatellite typing: comparative analysis of results and recommendations for optimization
Source: PubMed Central journal article supplement (PMC10266996; doi:10.1007/s10096-023-04597-7), 2023-04-24
Supplement: 10096_2023_4597_MOESM1_ESM.pdf [file 10096_2023_4597_MOESM1_ESM.pdf]

# Guidelines for microsatellite typing of *Toxoplasma gondii* using fifteen marker regions

Version 1.0; Date: 02.02.2023

## Content

|    |        |                                                                                     |
|----|--------|-------------------------------------------------------------------------------------|
| 1  |        |                                                                                     |
| 2  |        |                                                                                     |
| 3  |        |                                                                                     |
| 4  |        |                                                                                     |
| 5  | 1.     | Preparing samples for microsatellite (MS) typing..... 2                             |
| 6  | 1.1.   | DNA extraction..... 2                                                               |
| 7  | 1.2.   | Real time PCR to specifically quantify <i>T. gondii</i> DNA concentration..... 2    |
| 8  | 2.     | MS typing workflow..... 2                                                           |
| 9  | 2.1.   | General prerequisites and recommendations ..... 2                                   |
| 10 | 2.2.   | Multiplex PCR..... 3                                                                |
| 11 | 2.3.   | Loading samples to capillary sequencer..... 3                                       |
| 12 | 3.     | Key factors which may affect MS typing results..... 4                               |
| 13 | 3.2.   | Suboptimal DNA concentration and purity ..... 4                                     |
| 14 | 3.3.   | Varying fluorophore labeling..... 5                                                 |
| 15 | 3.4.   | Unintended or systematic differences in primer pair synthesis ..... 7               |
| 16 | 3.5.   | Effects related to capillary sequencer or size standards..... 7                     |
| 17 | 3.6.   | Differences in localization of bins for automatic allele identification ..... 7     |
| 18 | 3.7.   | Effects due to false interpretation of stutter peaks..... 7                         |
| 19 | 3.8.   | Effects due to limited experience and due to false strain classification..... 8     |
| 20 | 4.     | General rules for reading and interpreting capillary sequencing electropherograms 8 |
| 21 | 4.2.   | Identification of the correct size standard peaks..... 9                            |
| 22 | 4.3.   | Analyzing the electropherogram of controls..... 9                                   |
| 23 | 4.3.1. | Analyzing the electropherogram of the negative control..... 9                       |
| 24 | 4.3.2. | Analyzing the electropherograms of positive controls ..... 10                       |
| 25 | 5.     | Recommendations for optimal reference DNAs to be used ..... 10                      |
| 26 | 6.     | Recommendations for lineage typing ..... 10                                         |
| 27 | 7.     | Recommendation for reporting microsatellite results..... 11                         |
| 28 | 8.     | Appearance of MS peaks and recommendation for recording results ..... 11            |
| 29 | 9.     | Contact for inquiries ..... 18                                                      |
| 30 | 10.    | References ..... 19                                                                 |
| 31 | 11.    | Funding ..... 19                                                                    |
| 32 |        |                                                                                     |

## 33 1. Preparing samples for microsatellite (MS) typing

### 34 1.1. DNA extraction

35 DNA extraction should aim to extract as much as possible *Toxoplasma gondii* specific DNA  
36 and at the same time remove inhibitory components, e.g. by using column-based DNA  
37 extraction kits or DNA extraction robots.

### 38 1.2. Real time PCR to specifically quantify *T. gondii* DNA concentration

39 An optimal DNA concentration (see Section 3.2.) is essential for MS typing.

- 40 • It is recommended to quantify *T. gondii* specific DNA by real time PCR.
- 41 • *T. gondii* specific real time PCR reveals a Ct value which allows the estimation of the  
42 concentration of specific *T. gondii* DNA in the sample.
- 43 • Several protocols for *T. gondii* real time PCR amplification are published (e.g. based on  
44 the 529 bp repeat or the B1 gene). Optimal protocols are those employing specific  
45 primers as well as specific probes.
- 46 • Inter-laboratory comparisons revealed that it is not possible to define optimal sample Ct  
47 values for MS typing, due to differences in real time PCR protocols and the specificities  
48 and conditions of each laboratory.

## 49 2. MS typing workflow

### 50 2.1. General prerequisites and recommendations

- 51 • Optimally, equipment, suppliers of reagents and products must be identical to those  
52 reported in the original paper (Ajzenberg et al., 2010).
- 53 • New primers have to be tested prior to their use as differences between new batches  
54 from the same or different suppliers are possible.
- 55 • The type of fluorophore has an effect on the apparent size of amplified fragments.
- 56 • To implement the method (e.g. for selecting appropriate bins for analyzing sequencing  
57 results; examples in Fig. 1-4) and as control during later typing, DNAs of *T. gondii* type I, II  
58 and III reference strains are essential (Note: Using the same type I and type II reference  
59 strains passaged in the laboratory, like RH, ME49, or PRU, may allow the identification of  
60 cross-contamination of samples by laboratory reference strain DNA. Moreover, note that  
61 in strains cultured or passaged by bioassay for a long time, the MS typing patterns may  
62 have changed [Galal et al., 2022]. Thus, ask laboratories mentioned at the end of these  
63 guidelines to provide DNAs of reference strains, for which the typing pattern is well  
64 established [see Contact section]).
- 65 • Optimally, use well established software tools to analyze your data (e.g. Gene-Mapper,  
66 Geneious Prime etc).

- 67 • If the software tool allows, use bins in your analysis in order to have repeatable results  
68 for all loci. Adjust bin location by using fragments amplified by reference DNAs.

## 69 2.2. Multiplex PCR

### 70 Reagents

- 71 • Multiplex PCR kit (e.g. 2x Qiagen Multiplex PCR Master Mix)  
72 • 15 primer pairs (for details refer to Ajzenberg et al., 2010)  
73     ○ Forward primers labelled by 3 different fluorophores (e.g. FAM, HEX, NED as  
74         cited in Ajzenberg et al., 2010)  
75 • Molecular grade water

### 76 Reaction mix

- 77 • Targeted final primer concentration in the reaction mix (e.g. 25 µl total volume of  
78 reaction mix): 0.2 pmol/µl each primer (Note: Primer concentration may have an  
79 effect on the analytical sensitivity of the PCR, but also on its specificity).  
80 • Use an appropriate template volume: e.g. 1 µl for highly concentrated DNA (> 200  
81 tachyzoite/µl and 3 or 5 µl for less concentrated samples)

### 82 Cycling conditions

- 83 • 15 min at 94 - 95°C  
84 • 30 s at 94°C, 3 min at 61°C, and 30 s at 72°C (35 cycles)  
85 • 30 min at 60°C

86 The described reagents and their concentrations are only examples, mainly based on the  
87 original published protocol (Ajzenberg et al., 2010). It is possible to use a different multiplex  
88 PCR kit and different fluorophores for primer labeling, but consider that the fluorophore can  
89 have an impact on the results. It is also possible to multiplex less than 15 targets (e.g.  
90 splitting into typing and fingerprinting markers). For specific questions, individual primer  
91 pairs can be used in singleplex PCRs.

## 92 2.3. Loading samples to capillary sequencer

### 93 Equipment and Reagents

- 94 • Formamide solution  
95 • Size standard (labelling needs to be in accord with the fluorophores used for primers)  
96 • Capillary sequencer (Note: Read the user guide of your capillary sequencer to confirm  
97 that all reagents for intended use are compatible with this sequencer)

98 PCR products can be diluted in deionized formamide, depending on the amount of template  
99 DNA. One microliter of each diluted or non-diluted PCR product should be mixed with 0.5 µl  
100 of a dye-labelled size standard (e.g. ROX 500; Applied Biosystems) and 23.5 µl of deionized

101 formamide. This mixture should be denatured at 95 - 100°C for 4-5 min and then  
 102 electrophoresed using an automatic sequencer.

103 **3. Key factors which may affect MS typing results**

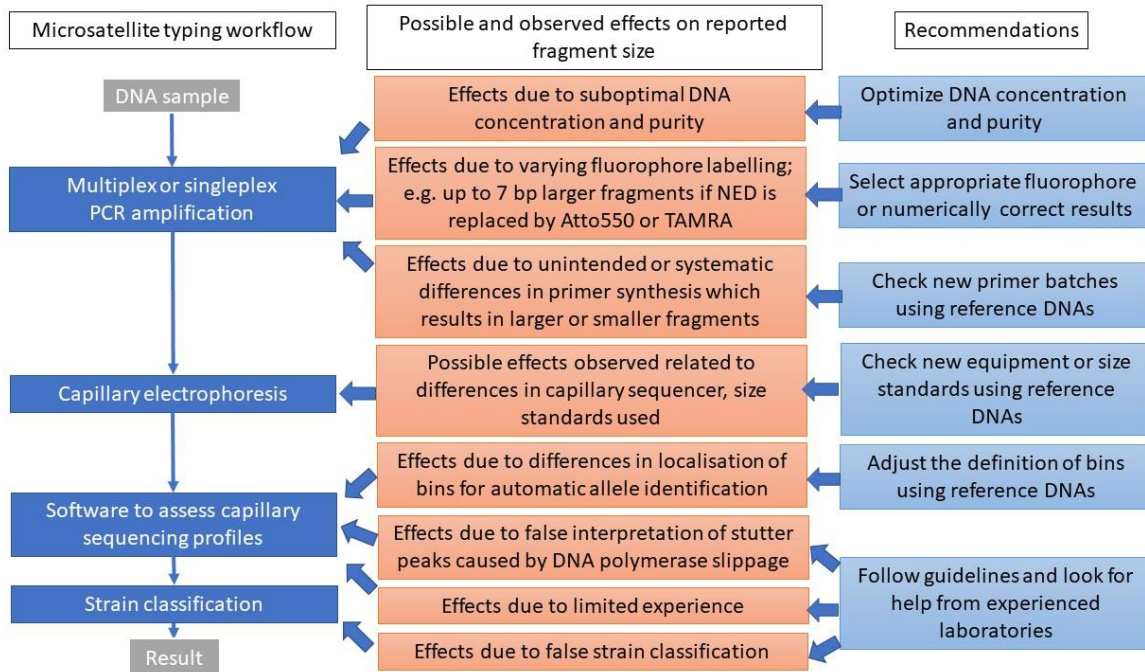

104  
 105 **Figure 1:** Putative effects on the *Toxoplasma gondii* microsatellite typing workflow  
 106 responsible for laboratory-, operator-specific or unspecific differences in the microsatellite  
 107 marker fragment sizes reported

108 **3.2. Suboptimal DNA concentration and purity**

109 An optimal DNA concentration and purity is necessary for optimal typing results. DNA  
 110 concentrations can be estimated by real time PCR (Note: The type of real time PCR  
 111 technique used and the specificities and conditions of each laboratory may cause differences  
 112 in Ct values, even if the DNA content in the sample is identical).

113 Too low concentration: For samples with 0.01 ng/μl *T. gondii*-specific DNA or less, usually  
 114 only part or even none of the marker regions can be amplified and used for typing.

115 Too high concentration: For high specific DNA concentrations, the sequencing sensor may  
 116 become saturated and it is almost impossible to read the peak. For highly concentrated  
 117 samples (*T. gondii* DNA concentration > 1 ng/μl), the number of non-specifically amplified  
 118 fragments may increase and it might become difficult to identify the correct peaks for  
 119 typing. For highly concentrated samples, so-called minus-A peaks prevail, which may  
 120 complicate interpretation (**Fig. 2**).

121

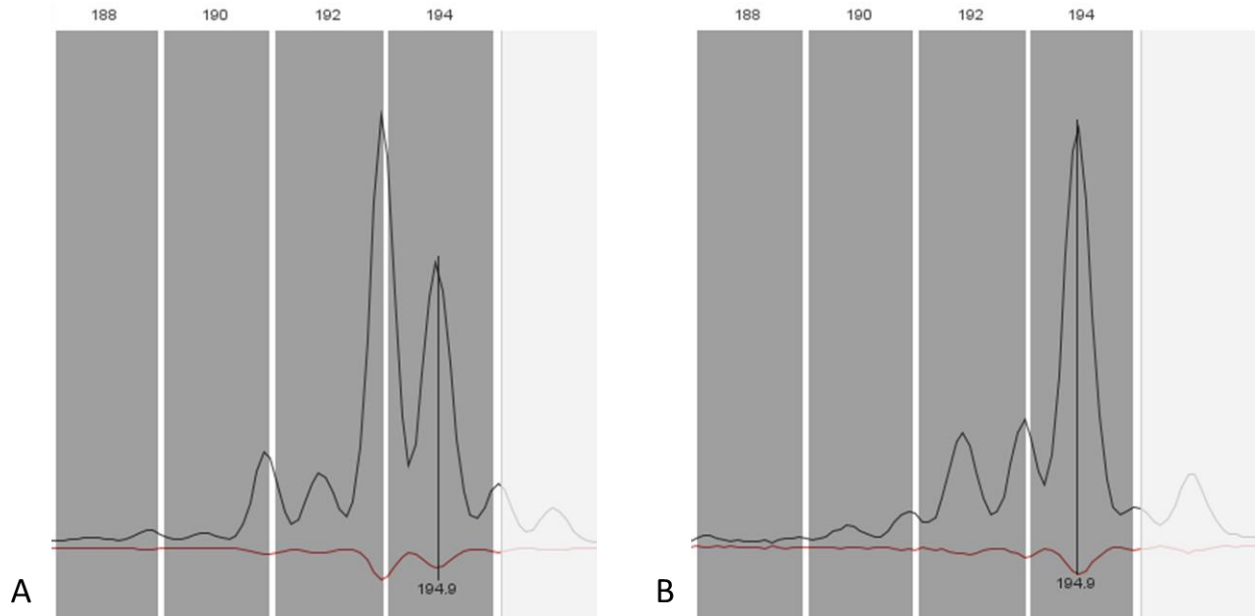

122

123 **Figure 2:** Illustration of the typical effect of the DNA concentration on the formation of  
124 minus-A peaks in the marker M102 of the type III reference strain NED. Bins to record  
125 fragment length results for the M102 locus are colored grey. (A) A high *T. gondii* DNA  
126 concentration caused a high minus-A peak, higher than the principal plus-A peak (194.9 bp).  
127 B: Using a 10<sup>-2</sup> dilution of the original template DNA prevented the formation of a minus-A  
128 peak in this example.

### 129 3.3. Varying fluorophore labeling

130 Replacement of originally reported fluorophores by others may cause differences in  
131 fragment size. E.g. if NED is replaced by Atto550, up to 5 bp larger fragments are observed.

#### 132 • Blue:

- 133 ○ Seven markers are labelled blue including:
  - 134 ▪ 4 typing markers: B18, M33, TUB2 and XI.1
  - 135 ▪ 3 fingerprinting markers: N61, M48 and N83
- 136 ○ Available fluorophores:
  - 137 ▪ 6-FAM (originally reported)

138

#### 139 • Green:

- 140 ○ Five markers are labelled green including:
  - 141 ▪ 4 typing markers: TgM-A, W35, IV.1 and B17
  - 142 ▪ 1 fingerprinting marker: N82
- 143 ○ Available fluorophores:
  - 144 ▪ HEX (originally reported)
  - 145 ▪ VIC: no difference to HEX-labelling reported, yet

146

147 • Yellow:

148 ○ Three markers are labelled yellow: N60, M102 and AA

149 ○ Available fluorophores:

150 ▪ NED (Originally reported)

151 ▪ Atto550: Differences compared to NED observed in length:

152 ❖ +4 bp for N60

153 ❖ +2 bp for M102

154 ❖ +2 bp for AA

155

156 ▪ TAMRA: Differences compared to NED observed in length:

157 ❖ +2 bp for N60 (example Fig. 3)

158 ❖ +2 bp for M102

159 ❖ +2 bp for AA

160

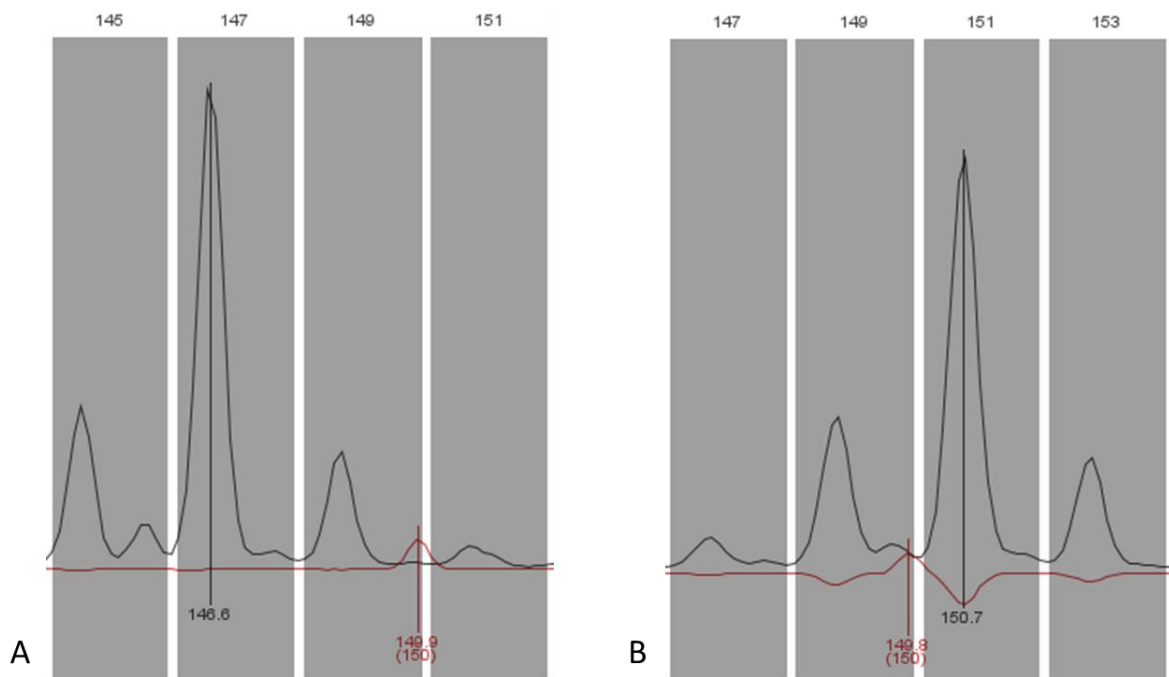

161

162 **Figure 3:** Example of the effect of using different fluorophores in the marker N60 for the  
163 type III reference strain NED. Bins to record fragment length results for the N60 locus are  
164 colored grey, peaks of the size standard ROX500 are colored red. If primers labelled with  
165 NED were used (A) the fragments were 4 bp smaller compared to Atto550 labelled  
166 fragments (B).

167 **3.4. Unintended or systematic differences in primer pair synthesis**

168 Primer pair synthesis may affect size of amplified fragments. Primer pairs with identical  
169 sequences but ordered from different suppliers resulted in different fragment sizes (**Fig. 4**).  
170 It is advised to check newly ordered primer batches using reference DNAs.

171

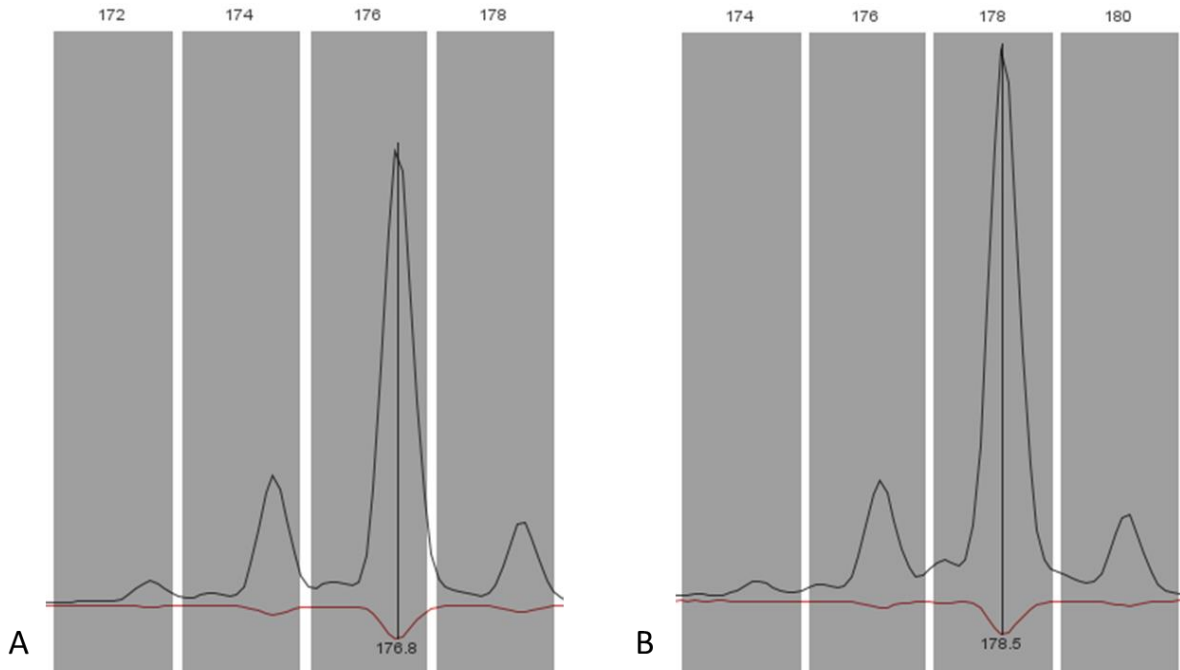

172

173 **Figure 4:** Example of the effect of using Atto550-labelled primers from different suppliers in  
174 the marker M102 for the type II reference strain ME49. Bins to record fragment length  
175 results for the M102 locus are colored grey. If primers with identical sequences from one  
176 supplier were used (A) the fragments were 2 bp smaller compared to fragments amplified  
177 from another supplier (B).

178 **3.5. Effects related to capillary sequencer or size standards**

179 Assess the effect the use of new capillary sequencing equipment or size standards may have  
180 by using reference DNAs.

181 **3.6. Differences in localization of bins for automatic allele identification**

182 Adjust the definition of bins using reference DNAs.

183 **3.7. Effects due to false interpretation of stutter peaks**

184 DNA polymerase slippage causes stutter peaks to a variable extent in the case of particular  
185 microsatellite marker regions (**Fig. 5**). Follow guidelines on the interpretation of stutter  
186 peaks (please refer to Section 7) and look for help from experienced laboratories.

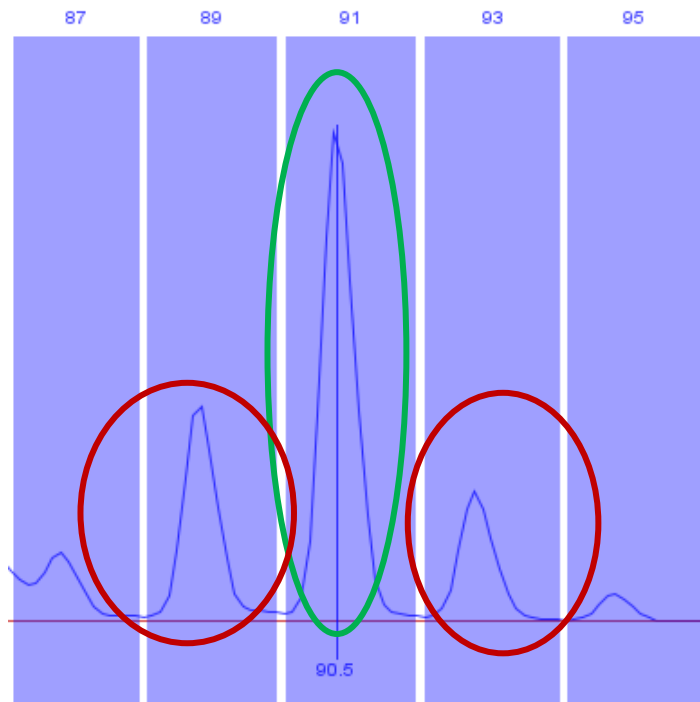

187

188 **Figure 5:** Example of non-specific stutter peaks (Red), with the true peak for this marker N61  
 189 (Green). Bins to record fragment length results for the N61 locus are colored light blue.

190 **3.8. Effects due to limited experience and due to false strain classification**

191 Limited experience in interpretation of capillary sequencer profiles may mean that unspecific  
 192 peaks are recorded while specific peaks are missed. This may cause false strain classification.  
 193 Follow guidelines and look for help from experienced laboratories.

194

195 **4. General rules for reading and interpreting capillary sequencing**  
 196 **electropherograms**

197 Each MS typing experiment should include positive controls consisting of reference DNAs.  
 198 Please refer to optimally characterized reference DNAs mentioned in this guideline (Type I,  
 199 Type II, Type III, Africa1). A negative control needs to be included too (e.g. water or any  
 200 appropriate DNA related to the sample [i.e. DNA from the same host species or the same  
 201 sample matrix without Toxoplasma DNA]).

202 For reading the profiles please always follow the same order:

- 203
- First, check out the size standard peaks for each of the genotyped samples, beginning  
 204 with the positive and negative controls. Please follow the user guide of your capillary  
 205 sequencer.
  - In a second step, analyze the profiles of negative and positive controls.  
 206



- 207
- 208
- 209
- 210
- In a third step, analyze profiles of test samples. Visualize and assess the electropherograms of test samples individually, fluorophore by fluorophore and always compare peak characteristics observed in individual samples to those of the negative and positive controls (see below).

## 211 4.2. Identification of the correct size standard peaks

212 For the correct estimation of fragment sizes of amplified microsatellite markers, it is  
213 essential to identify all size marker peaks correctly (**Fig. 6**). Size estimates provided for these  
214 peaks need to be compared to those provided from the supplier of the size standard.  
215 Capillary sequencer user guides may recommend excluding particular markers from  
216 fragment length analysis. The intensity of the size standard peaks should be 30% to 100% of  
217 the intensity of the sample peaks.

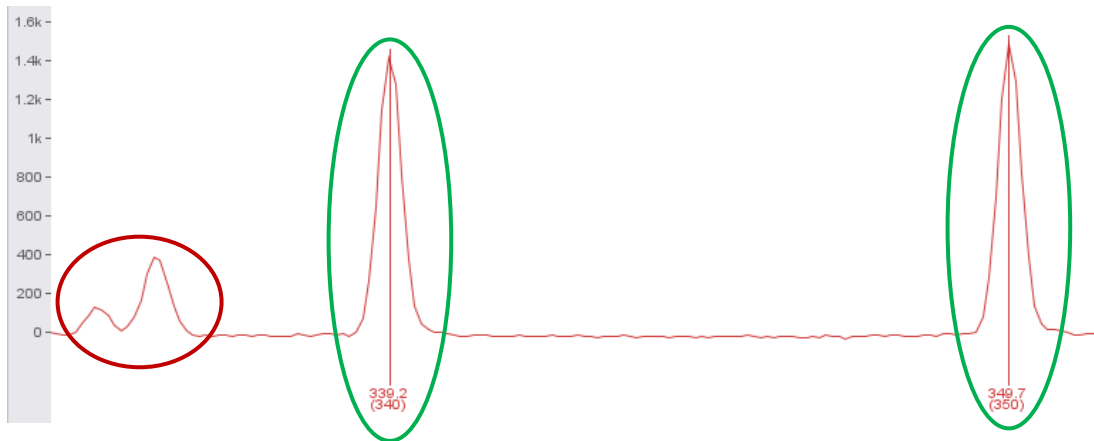

218 **Figure 6:** Correct (Green) and incorrect (Red) aspects of the size standard (ROX500) peaks.

## 219 4.3. Analyzing the electropherogram of controls

220 Peaks of controls and also those of the unknown samples should have about the same height  
221 or up to three times the height of size standard peaks. If they are too high, there is too much  
222 *T. gondii* DNA. This may result in the emergence of the so-called Minus A-Peaks. For optimal  
223 results, repeat the experiment with diluted template DNA or dilute the PCR products. To  
224 avoid experiment repetitions, adjust the amount of specific DNA beforehand based on real  
225 time PCR results.

### 226 4.3.1. Analyzing the electropherogram of the negative control

227 Look at the profile of the negative control:

- 228
- 229
- 230
- 231
- Confirm that MS peaks are absent. If there are MS peaks this could be an indication of carry-over or cross contamination.
  - Look out for non-specific peaks (e.g. so-called “injection peaks”). This may help to identify non-specific peaks in the profiles of the unknown samples.

### 232 4.3.2. Analyzing the electropherograms of positive controls

233 Look at the profile of the positive control(s):

- 234 • Confirm that the peaks identified match the values expected for reference DNA.
- 235 • Confirm location of bins.
- 236 • Look for non-specific peaks, as described for the negative control.
- 237 • If there are differences in the results, to those expected, consider potential reasons
- 238 as mentioned in Section 3.

## 239 5. Recommendations for optimal reference DNAs to be used

240 For reliable MS typing, and especially when you start using the MS genotyping technique for  
241 the first time, choose some of the DNAs from the following isolates to include them in each  
242 run of MS typing: GT1 or RH (Type I), ME49 or PRU (Type II), CTG, VEG or NED (Type III).  
243 Later, one *T. gondii* Type II and one Type III reference DNA appears to be sufficient as  
244 controls for individual runs. As mentioned earlier, please note that, during long-time  
245 cultivation or passaging of strains, minor changes in the MS patterns may occur. Thus, it is  
246 recommended to ask the authors of these guidelines for well characterized reference DNAs  
247 from their stocks.

## 248 6. Recommendations for lineage typing

249 For lineage typing please refer to **Table 1**.

250 **Table 1:** Expected values for lineage typing markers for different reference strains (Blue,  
251 labelled with 6-FAM; Green, labelled with HEX) (Galal et al., 2022)

| MS genotype | B18       | M33 | TUB2  | XI.1   | TgM-A    | W35   | IV.1 | B17 |
|-------------|-----------|-----|-------|--------|----------|-------|------|-----|
| Type I      | 160       | 169 | 291   | 358    | 209      | 248   | 274  | 342 |
| Type II     | 158       | 169 | 289   | 356    | 207      | 242-4 | 274  | 336 |
| Type III    | 160       | 165 | 289   | 356    | 205      | 242   | 278  | 336 |
| Africa 1    | 160       | 165 | 291   | 354    | 205      | 248   | 274  | 342 |
| Africa 3    | 160       | 165 | 291   | 354    | 207      | 242   | 278  | 342 |
| Africa 4    | 156       | 165 | 291-3 | 354    | 203      | 242   | 274  | 336 |
| Caribbean 1 | 162       | 165 | 291   | 356    | 205      | 242   | 278  | 342 |
| Caribbean 2 | 162       | 165 | 291   | 356    | 205      | 242   | 278  | 336 |
| Caribbean 3 | 162       | 165 | 289   | 356    | 205      | 242   | 278  | 336 |
| Chinese 1   | 160       | 169 | 293   | 354    | 211      | 242   | 274  | 336 |
| Type 12*    | 158-60-62 | 169 | 289   | 356-62 | 207-9-11 | 242   | 274  | 336 |

252 \* Type 12 has a complex classification, probably because of more than a single population  
253 within this lineage

254 In the case of minor deviations (up to 2 bp) from the expected values in a single MS marker,  
255 it is advised to designate the observed genotype as Type-variant. Such variants may often  
256 not represent recombinants or unclassified strains but variants of known lineages. To  
257 confirm recombination or the observation of an unclassified strain, it is necessary to use  
258 other techniques, optimally whole genome sequencing. Multi locus sequence typing (MLST)  
259 may also help.

## 260 **7. Recommendation for reporting microsatellite results**

261 Reporting microsatellite results, e.g. in publications, requires that essential details of  
262 genotyping MS markers are mentioned:

### 263 Methods

- 264 - A statement on primer pair sequences (e.g. a reference)
- 265 - The fluorophores used for individual primer pairs
- 266 - The supplier of the primers
- 267 - The size marker applied and which of the markers were used to assess fragment size
- 268 - Treatment of amplified fragments prior to loading capillary sequencer
- 269 - Capillary sequencing equipment
- 270 - Software used to assess sequencing profiles and a brief description on details (loci,  
271 bins)
- 272 - *Toxoplasma gondii* reference DNAs used in individual runs, including their  
273 origin/provider

### 274 Results

- 275 - MS typing results and Ct values for all samples
- 276 - MS typing results for reference DNAs

## 277 **8. Appearance of MS peaks and recommendation for recording** 278 **results**

279 In the following table, the appearance of peaks in *T. gondii* MS typing and a number of  
280 recommendations on how to record MS fragment sizes based on capillary sequencing are  
281 listed (**Table 2**). Please note, that these peak profiles displayed are only examples. The  
282 appearance of peaks is often similar for a given marker, but may change from one  
283 experiment to another. Among others, potential reasons are differences in template DNA  
284 concentration, the capillary sequencing device and the type of PCR applied, i.e., multiplex or  
285 simplex. Note, that stuttering of DNA polymerase may result in multiple fragment sizes and  
286 in a “Hedgehog”-like appearance of the sequencing profile.

287

288 **Table 2:** Exemplary appearance of peaks in *T. gondii* MS typing and recommendations on  
 289 how to record MS fragment sizes based on capillary sequencing results. The appearance of  
 290 the profiles can vary, e. g. due to different concentrations of the samples. In these examples,  
 291 the correct peaks are marked with an arrow.

| <b>Marker<br/>(lineage<br/>typing<br/>markers<br/>are bold)</b> | <b>Recommend-<br/>ations for<br/>recording</b>                                                                                                                                                       | <b>Example<br/>(ME49)<br/>for peak appearance<br/>(Capillary sequencer:<br/>Hitachi 3500 Genetic<br/>Analyzer, Analyzing<br/>software: Geneious Prime)</b> | <b>Example<br/>(ME49)<br/>for peak appearance (Capillary<br/>sequencer: 3130xl Genetic<br/>Analyzer, Analyzing software:<br/>Gene-Mapper)<br/>Acronyms: al = recorded size,<br/>sz = original size, ht = height of<br/>the peak</b> |
|-----------------------------------------------------------------|------------------------------------------------------------------------------------------------------------------------------------------------------------------------------------------------------|------------------------------------------------------------------------------------------------------------------------------------------------------------|-------------------------------------------------------------------------------------------------------------------------------------------------------------------------------------------------------------------------------------|
| <b>N61</b>                                                      | <ul style="list-style-type: none"> <li>- Odd value</li> <li>- This marker is prone to stuttering (“Hedgehog” look); consider the last high peak before the peak height starts to decrease</li> </ul> | 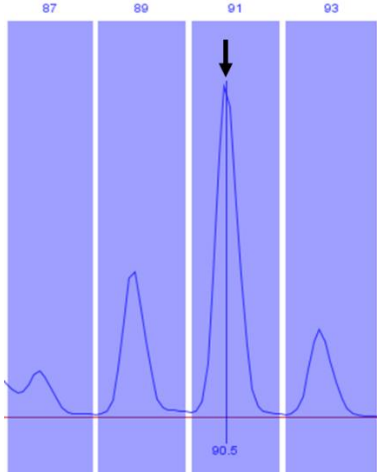                                                                         |                                                                                                                                                 |
| <b>B18</b>                                                      | <ul style="list-style-type: none"> <li>- Always record an even value</li> </ul>                                                                                                                      |                                                                         |                                                                                                                                                |

|                    |                                                                                                                                                                                      |                                                                                      |                                                                                       |
|--------------------|--------------------------------------------------------------------------------------------------------------------------------------------------------------------------------------|--------------------------------------------------------------------------------------|---------------------------------------------------------------------------------------|
| <p><b>M33</b></p>  | <ul style="list-style-type: none"> <li>- Always record an odd value</li> <li>- In case of a double peak, located in two different bins, choose the 2<sup>nd</sup> one</li> </ul>     | 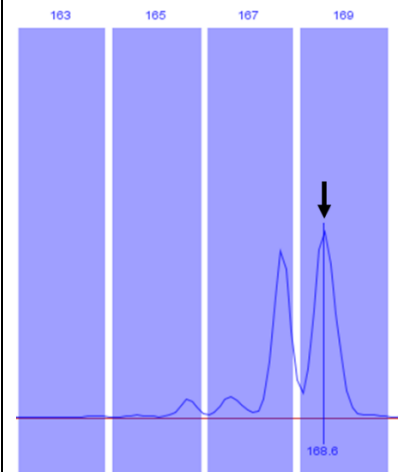   |    |
| <p><b>M48</b></p>  | <ul style="list-style-type: none"> <li>- Always record an odd value</li> <li>- In the case of a double peak, located in two different bins, choose the 2<sup>nd</sup> one</li> </ul> |   |   |
| <p><b>TUB2</b></p> | <ul style="list-style-type: none"> <li>- Always record an odd value</li> <li>- In the case of a double peak, located in two different bins, choose the 2<sup>nd</sup> one</li> </ul> |  |  |

|             |                                                                                                                                                                                                                             |                                                                                     |                                                                                      |
|-------------|-----------------------------------------------------------------------------------------------------------------------------------------------------------------------------------------------------------------------------|-------------------------------------------------------------------------------------|--------------------------------------------------------------------------------------|
| <p>N83</p>  | <ul style="list-style-type: none"> <li>- Always record an even value</li> </ul>                                                                                                                                             | 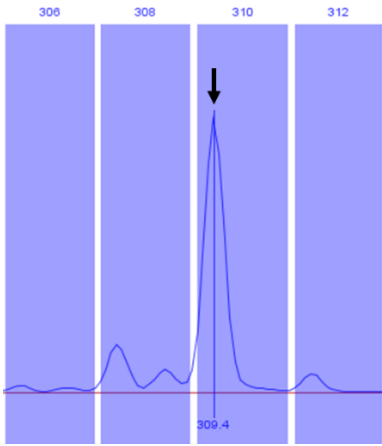  |   |
| <p>XI.1</p> | <ul style="list-style-type: none"> <li>- Always record an even value</li> <li>- In the case of a double peak, located in two different bins, choose the 2<sup>nd</sup> one (it may be weak or absent in type II)</li> </ul> |  |  |

|                     |                                                                                                                                                                                       |                                                                                     |                                                                                       |
|---------------------|---------------------------------------------------------------------------------------------------------------------------------------------------------------------------------------|-------------------------------------------------------------------------------------|---------------------------------------------------------------------------------------|
| <p><b>N82</b></p>   | <ul style="list-style-type: none"> <li>- Always record an odd value</li> <li>- Usually, there is only a single peak</li> </ul>                                                        | 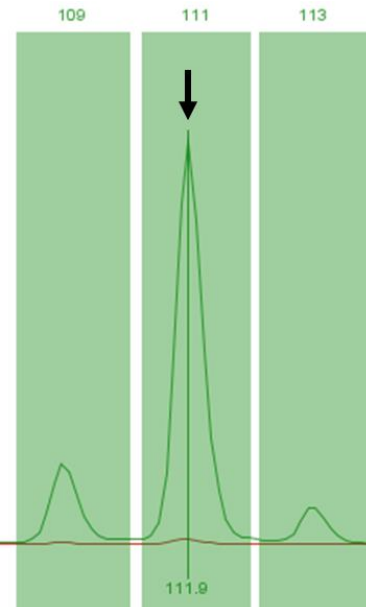   |    |
| <p><b>TgM-A</b></p> | <ul style="list-style-type: none"> <li>- Always record an odd value</li> <li>- In the case of a double peak, located in two different bins, choose the 2<sup>nd</sup> one</li> </ul>  |   |   |
| <p><b>W35</b></p>   | <ul style="list-style-type: none"> <li>- Always record an even value</li> <li>- In the case of a double peak, located in two different bins, choose the 2<sup>nd</sup> one</li> </ul> |  |  |

|                    |                                                                                                                                                                                       |                                                                                    |                                                                                      |
|--------------------|---------------------------------------------------------------------------------------------------------------------------------------------------------------------------------------|------------------------------------------------------------------------------------|--------------------------------------------------------------------------------------|
| <p><b>IV.1</b></p> | <ul style="list-style-type: none"> <li>- Always record an even value</li> <li>- In the case of a double peak, located in two different bins, choose the 2<sup>nd</sup> one</li> </ul> | 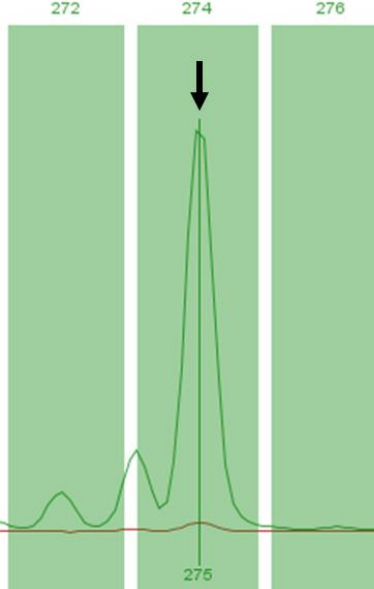  |   |
| <p><b>B17</b></p>  | <ul style="list-style-type: none"> <li>- Always record an even value</li> <li>- In the case of a double peak, located in two different bins, choose the 2<sup>nd</sup> one</li> </ul> |  |  |



|            |                                                                                                                                                                                                                                                                                                                                                                                                                                     |                                                                                                                                                                                       |                                                                                      |
|------------|-------------------------------------------------------------------------------------------------------------------------------------------------------------------------------------------------------------------------------------------------------------------------------------------------------------------------------------------------------------------------------------------------------------------------------------|---------------------------------------------------------------------------------------------------------------------------------------------------------------------------------------|--------------------------------------------------------------------------------------|
| <p>N60</p> | <p>Dye: NED</p> <ul style="list-style-type: none"> <li>- Always record an even value when &lt; 145 and an odd value when ≥ 145</li> </ul> <p>Dye: Atto550</p> <ul style="list-style-type: none"> <li>- Always record an even value when &lt; 149 and an odd value when ≥ 149</li> </ul> <p>Dye: TAMRA</p> <ul style="list-style-type: none"> <li>- Always record an even value when &lt; 147 and an odd value when ≥ 147</li> </ul> | 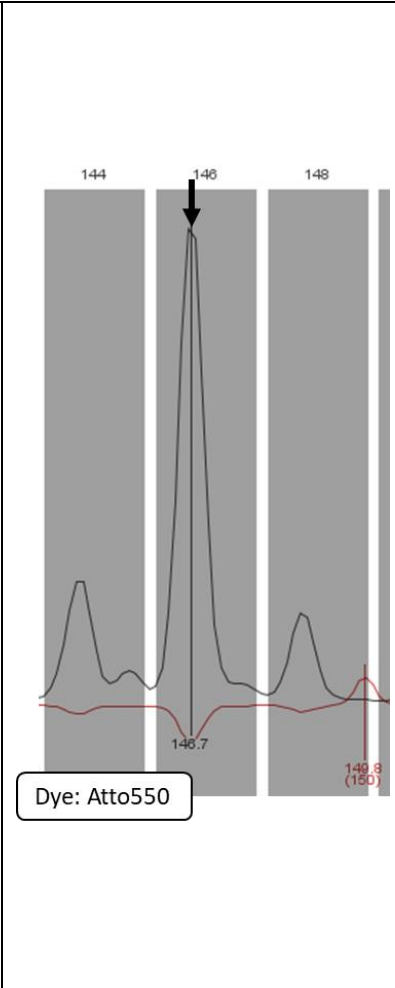                                                                                                   |  |
|            | <p>M102</p>                                                                                                                                                                                                                                                                                                                                                                                                                         | <ul style="list-style-type: none"> <li>- Always record an even value</li> <li>- In the case of a double peak, located in two different bins, choose the 2<sup>nd</sup> one</li> </ul> |  |

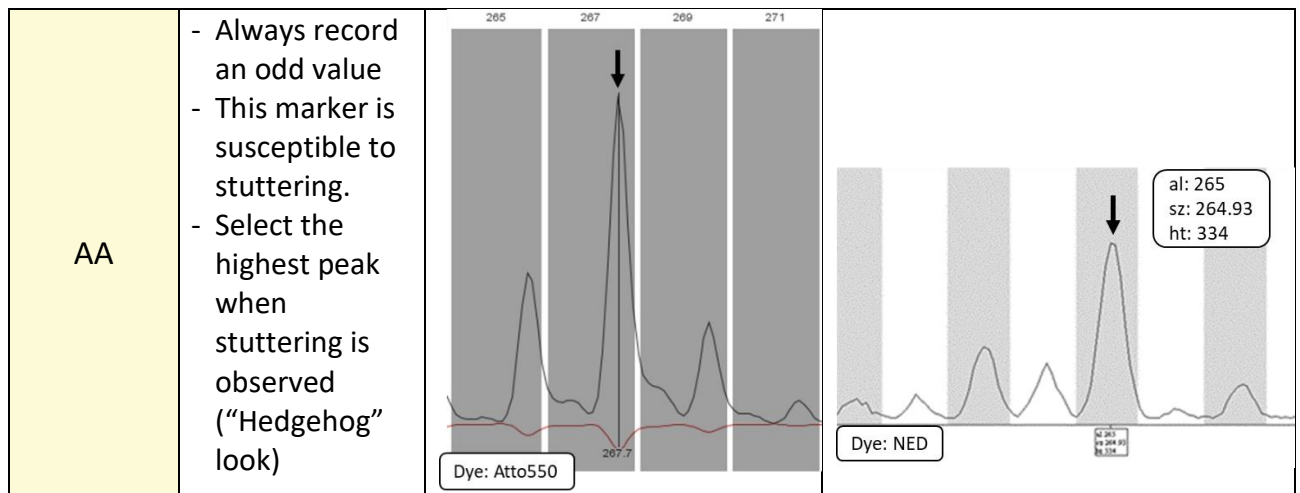

292

## 293 9. Contact for inquiries

294 Aurélien Mercier, [aurelien.mercier@unilim.fr](mailto:aurelien.mercier@unilim.fr)  
 295 Inserm U1094, IRD U270, EpiMaCT - Epidemiology of chronic diseases in tropical zone  
 296 Faculté de Médecine  
 297 2, rue du Dr Marcland, 87025 Limoges, France  
 298 Tél : +33 5 19 56 42 65  
 299 <http://www.unilim.fr/ient>

300

301 Gereon Schares, [gereon.schares@fli.de](mailto:gereon.schares@fli.de)  
 302 Friedrich-Loeffler-Institut  
 303 Federal Research Institute for Animal Health  
 304 Südufer 10, 17493 Greifswald - Insel Riems, Germany  
 305 Tel: +49 38351 71544/1694/1695/1658/1677 | Fax: +49 38351 7 1526, 1174  
 306 <https://www.fli.de>

307

308 Rafael Calero-Bernal, [r.calero@ucm.es](mailto:r.calero@ucm.es)  
 309 Complutense University of Madrid  
 310 Ciudad Universitaria s/n, Madrid 28040, Spain  
 311 Tel: +34913944095  
 312 <https://ucm.es/saluvet>

313

314 Clare Hamilton, [clare.hamilton@moredun.ac.uk](mailto:clare.hamilton@moredun.ac.uk)  
 315 Moredun Research Institute, Pentlands Science Park  
 316 Bush Loan, Penicuik, Midlothian EH26 OPZ, Scotland  
 317 Tel: +44 (0)131 445 5111 | Fax: +44 (0)131 445 6111  
 318 <https://www.moredun.org.uk>

319

320

321 Pikka Jokelainen, [pjo@ssi.dk](mailto:pjo@ssi.dk)  
322 Infectious Disease Preparedness  
323 Statens Serum Institut  
324 Artillerivej 5, 2300 Copenhagen S, Denmark  
325 Tel: +45 32688679  
326 <https://en.ssi.dk>  
327  
328

## 329 **10. References**

- 330 (1) Ajzenberg D., Collinet F., Mercier A., Vignoles P., et Dardé M.-L. Genotyping of  
331 *Toxoplasma gondii* isolates with 15 microsatellite markers in a single multiplex PCR  
332 assay. Journal of Clinical Microbiology. 2010 Dec, 48 (12): 4641-45.  
333 doi:10.1128/JCM.01152-10.
- 334 (2) Galal L, Ariev F, Gouilh MA, Dardé ML, Hamidović A, Letourneur F, Prugnolle F, Mercier A.  
335 A unique *Toxoplasma gondii* haplotype accompanied the global expansion of cats. Nat  
336 Commun. 2022 Oct 1;13(1):5778. doi: 10.1038/s41467-022-33556-7.

337

## 338 **11. Funding**

339 This work was supported by funding from the European Union's Horizon 2020 Research and  
340 Innovation programme under grant agreement No 773830: One Health European Joint  
341 Programme, TOXOSOURCES project, by funds from the French Agence Nationale de la  
342 Recherche (ANR project IntroTox 17-CE35-0004) and funds from the Scottish Government  
343 Rural and Environment Science and Analytical Services Division (RESAS).
